# Supplementary material for: Functionalized Pluronic-b-poly(ε-caprolactone) based nanocarriers of paclitaxel: solubilization, antiproliferative efficacy and in vivo pharmaceutic kinetics
Source: Royal Society of Chemistry journal article supplement (doi:10.1039/c5tb00196j), 2015-01-01
Supplement: c5tb00196j1.pdf [file c5tb00196j1.pdf]

ARTICLE

Electronic Supplementary Information  
for

**Functionalized Pluronic-*b*-poly( $\epsilon$ -caprolactone) based nanocarriers of paclitaxel:  
Solubilization, antiproliferative efficacy and *in vivo* pharmaceutic kinetics**

Zhengzhen Du,<sup>a</sup> Yan Zhang,<sup>\*,a</sup> Heng Xu,<sup>b</sup> Meidong Lang<sup>\*,a,c</sup>

<sup>a</sup> Shanghai Key Laboratory of Advanced Polymeric Materials, Key Laboratory for Ultrafine Materials of Ministry of Education, School of Materials Science and Engineering, East China University of Science and Technology, Shanghai 200237, China

<sup>b</sup> Anhui Collaborative Innovation Center for Petrochemical New Materials, School of Chemistry and Chemical Engineering, Anqing Normal University, Anqing 246011, China

<sup>c</sup> Shanghai Collaborative Innovation Center for Biomanufacturing Technology, Shanghai 200237, China

Correspondence to: Y. Zhang (Fax: +86-21-64253916; Tel: +86-21-64253432; E-mail: zhang\_yan@ecust.edu.cn.) or M. Lang (Fax: +86-21-64253916; Tel: +86-21-64253916 ;E-mail: [mdlang@ecust.edu.cn](mailto:mdlang@ecust.edu.cn))

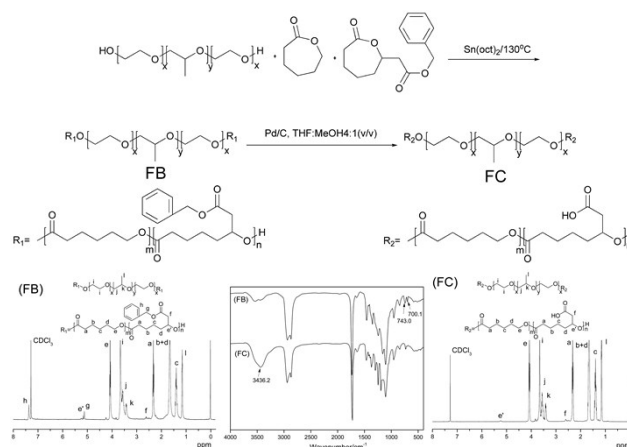

Fig. S1 the synthetic route and the characterization of FB and FC

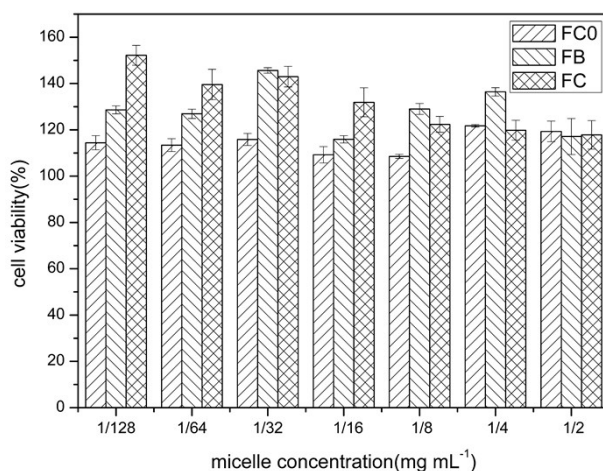

Fig. S2 the cytotoxicity of three blank micelles

Table S1 the characterization of three typical functional Pluronic-*b*-PCLs

| Sample | Mn <sup>a</sup> ( $\times 10^4$ ) | Mn <sup>b</sup> ( $\times 10^4$ ) | PDI <sup>b</sup> | Content <sup>a,c</sup> |
|--------|-----------------------------------|-----------------------------------|------------------|------------------------|
| FC0    | 2.7                               | 1.9                               | 1.26             | 0                      |
| FB     | 2.6                               | 2.0                               | 1.46             | 18.2                   |
| FC     | 2.2                               | 2.3                               | 1.35             | 17.4                   |

<sup>a</sup> Calculated by <sup>1</sup>H NMR with the unit of g mol<sup>-1</sup>. <sup>b</sup> determined by GPC(THF as mobile phase) with the unit of g mol<sup>-1</sup>. <sup>c</sup> Content meant the content of functional CL unit in the copolymer and defined as following formula: (mole of functional CL unit in the copolymer)/ (mole of functional CL unit and CL unit in the copolymer).

Table S2 The DLC and EE of PTX loading polymeric micelles. Data are presented as mean  $\pm$  SD (n = 3)

| Polymer | Feed Weight Ratio of PTX:polymer (w/w) | EE (%)           | DLC (wt.%)       |
|---------|----------------------------------------|------------------|------------------|
| FC0     | 0.1:10                                 | 85.23 $\pm$ 2.44 | 0.89 $\pm$ 0.05  |
| FB      | 0.1:10                                 | 90.74 $\pm$ 3.09 | 0.93 $\pm$ 0.03  |
| FC      | 0.1:10                                 | 93.22 $\pm$ 6.61 | 0.95 $\pm$ 0.06  |
| FC0     | 0.2:10                                 | 82.33 $\pm$ 4.87 | 1.73 $\pm$ 0.09  |
| FB      | 0.2:10                                 | 88.61 $\pm$ 5.33 | 1.84 $\pm$ 0.11  |
| FC      | 0.2:10                                 | 90.7 $\pm$ 2.08  | 1.86 $\pm$ 0.04  |
| FC0     | 0.5:10                                 | 77.14 $\pm$ 3.31 | 3.92 $\pm$ 0.17  |
| FB      | 0.5:10                                 | 82.29 $\pm$ 2.93 | 4.21 $\pm$ 0.15  |
| FC      | 0.5:10                                 | 85.69 $\pm$ 5.39 | 4.37 $\pm$ 0.26  |
| FC0     | 1:10                                   | 69.48 $\pm$ 3.15 | 6.71 $\pm$ 0.29  |
| FB      | 1:10                                   | 75.94 $\pm$ 2.78 | 7.35 $\pm$ 0.27  |
| FC      | 1:10                                   | 78.56 $\pm$ 4.09 | 7.48 $\pm$ 0.38  |
| FC0     | 5:10                                   | 32.28 $\pm$ 5.19 | 13.56 $\pm$ 1.78 |
| FB      | 5:10                                   | 43.85 $\pm$ 6.37 | 17.15 $\pm$ 2.31 |
